# Supplementary material
Source: MDPI journal article supplement (https://www.mdpi.com/2072-4292/10/9/1498)
Supplement: s1 [file s1]

## Supplemental Material

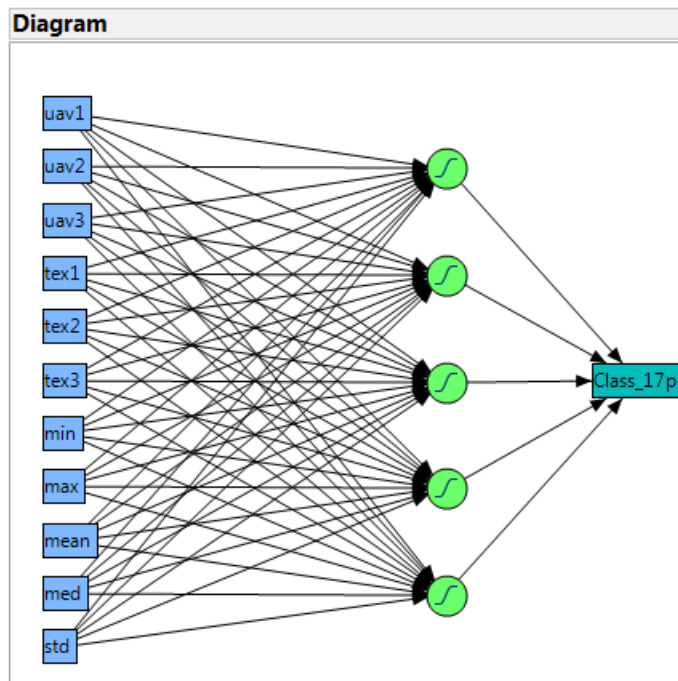

**Figure S1.** Artificial Neural Network used in our cover classification efforts, with five nodes using TanH with eleven input variables. uav1=blue band, uav2=green band, uav3=red band, tex1=entropy, tex2=ASM, tex3=evenness, min=minimum, max=maximum, mean=mean, med=median, std=standard deviation.

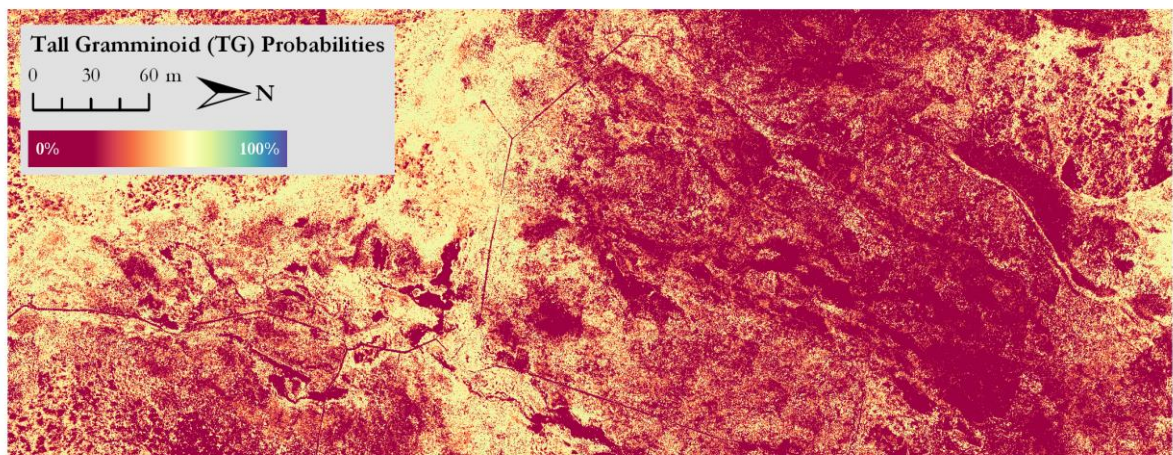

**Figure S2.** Probability map from an ANN for the Tall Graminoid cover class.

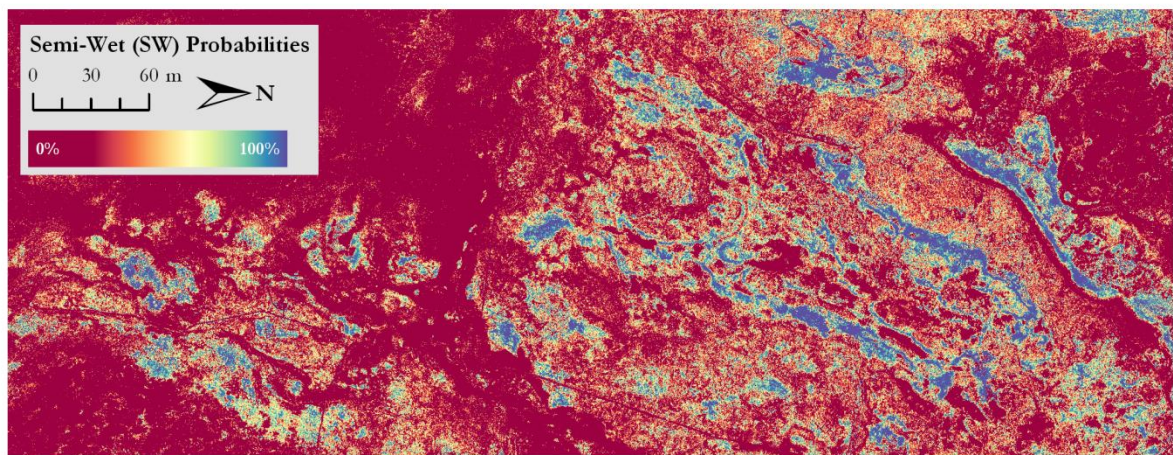

**Figure S3.** Probability map from an ANN for the Semi-Wet cover class.

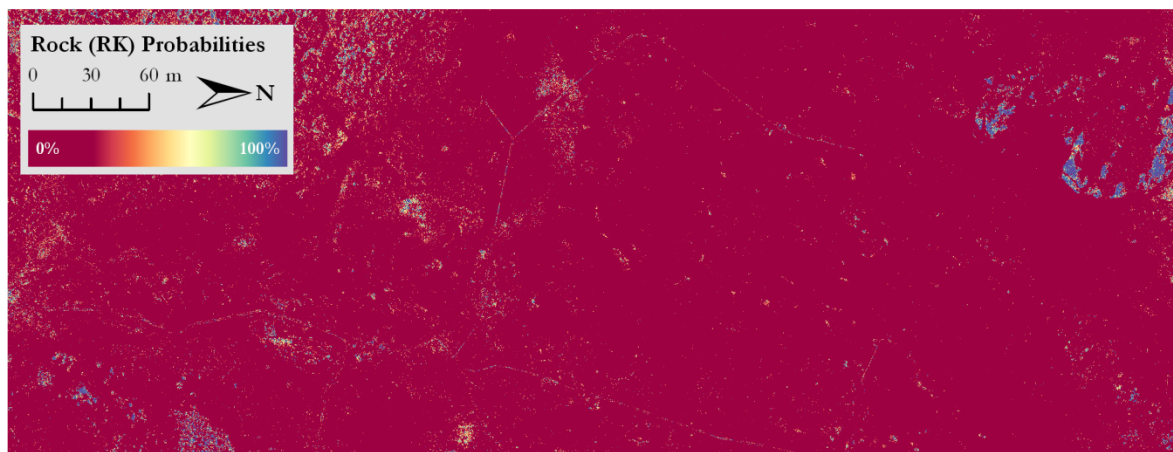

**Figure S4.** Probability map from an ANN for the Rock cover class.

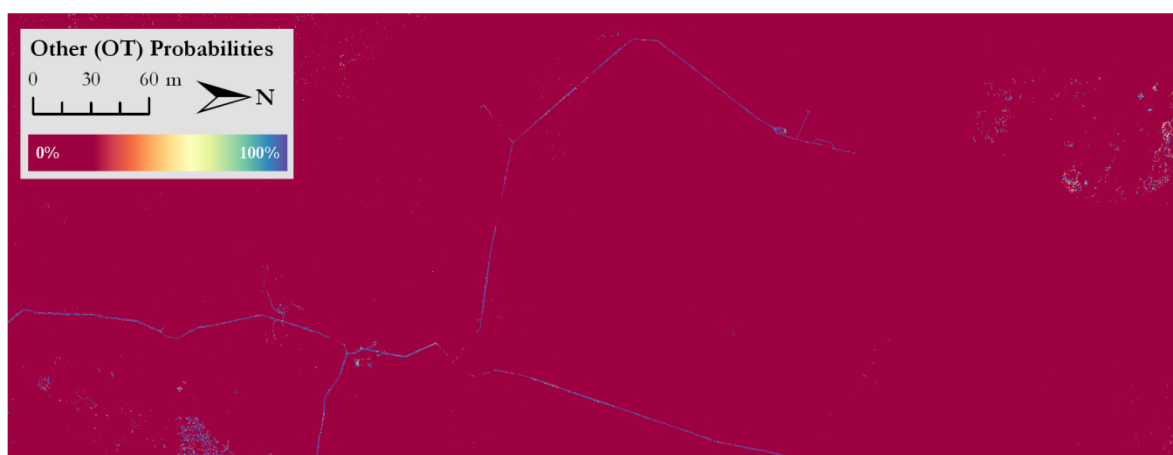

**Figure S5.** Probability map from an ANN for Other cover class.



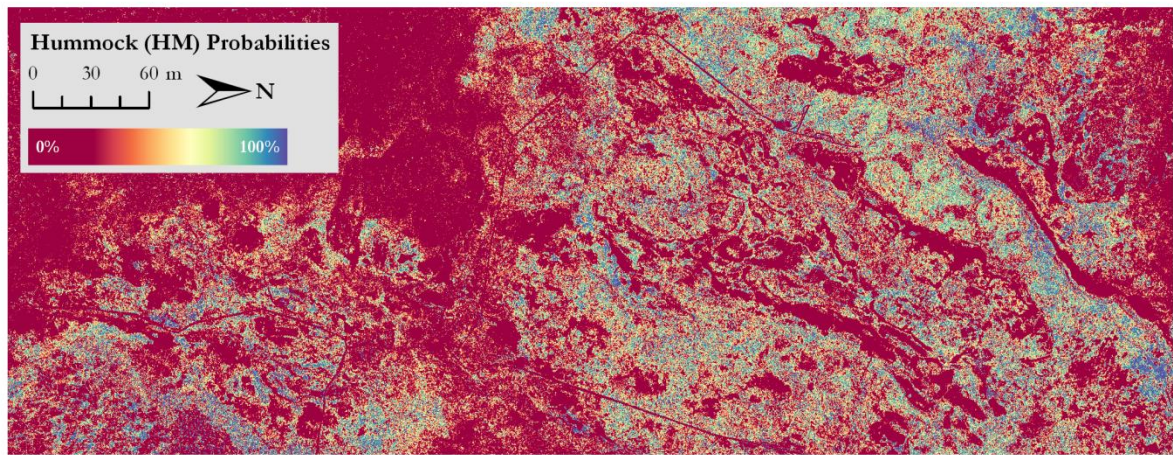

**Figure S6.** Probability map from an ANN for the Hummock cover class

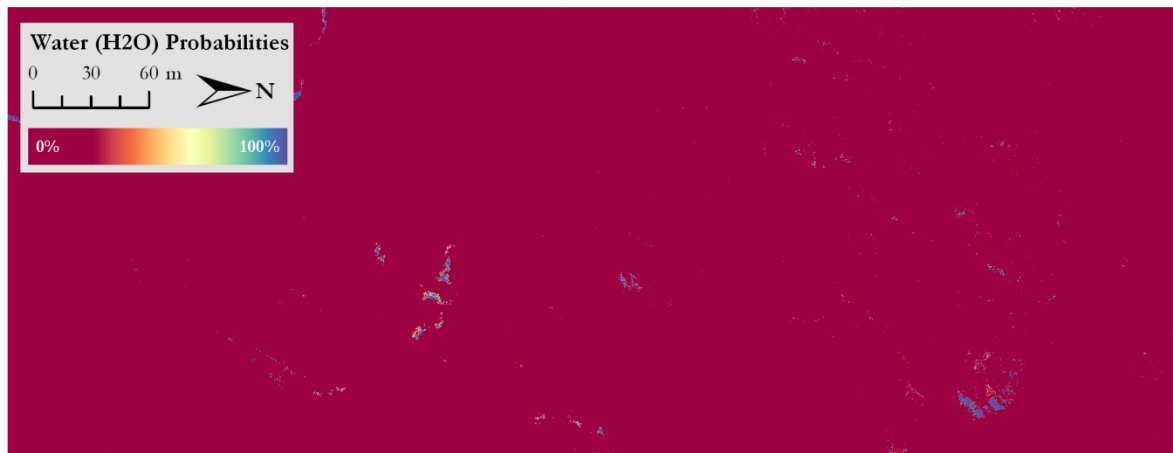

**Figure S7.** Probability map from an ANN for the Water cover class

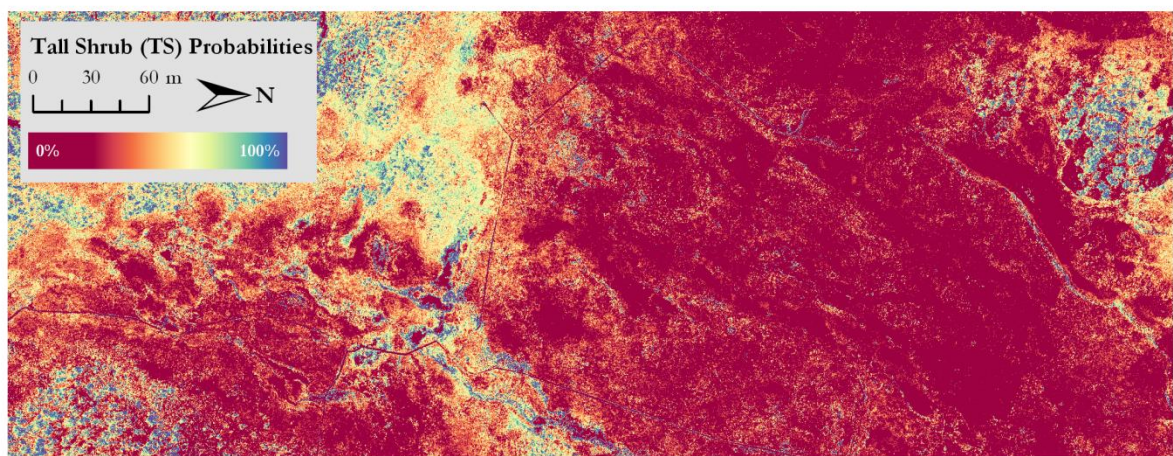

**Figure S8.** Probability map from an ANN for the Tall Shrub cover class

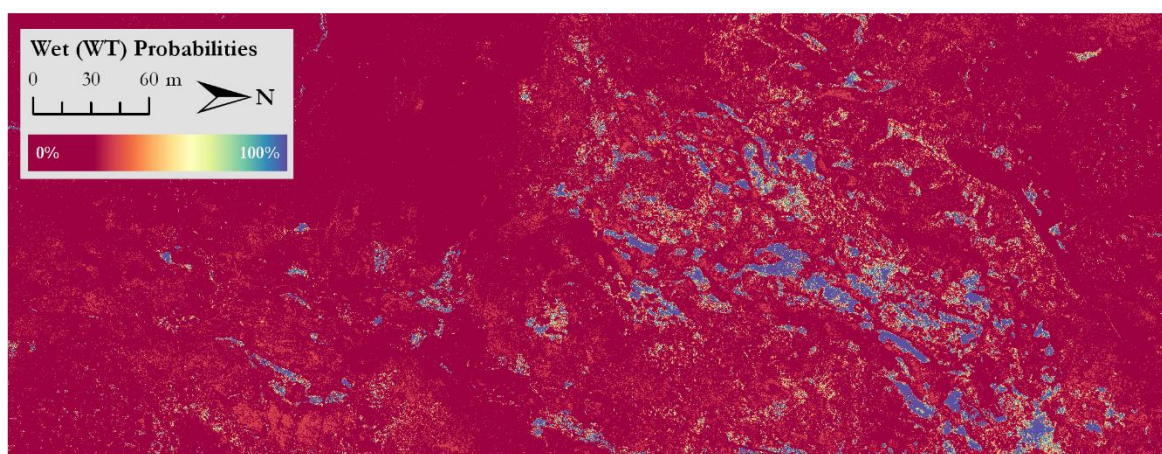

**Figure S9.** Probability map from an ANN for the Wet cover class

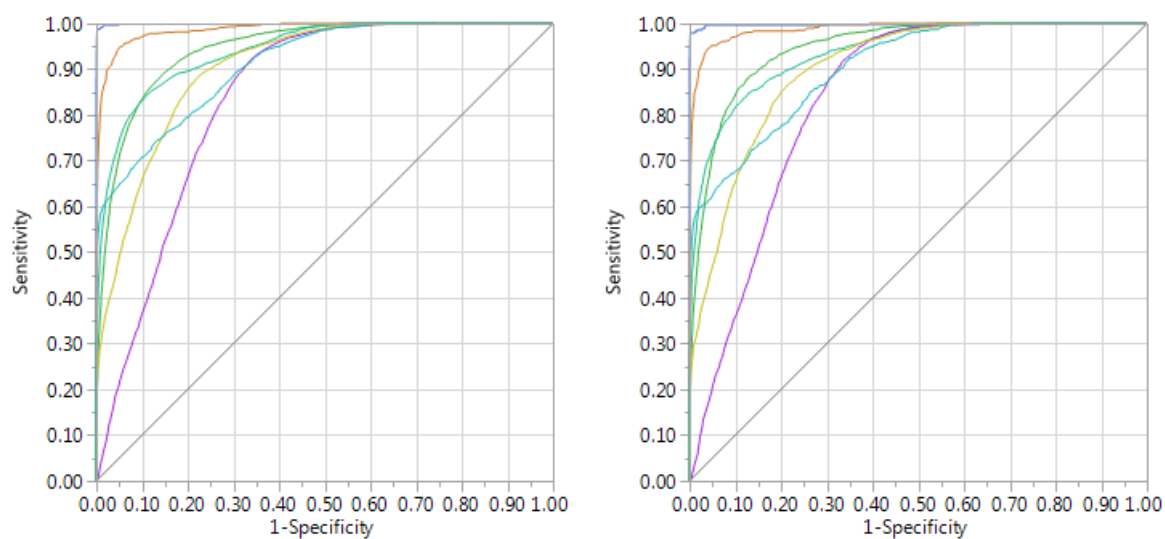

| Class_17p | Area   | Class_1 | Area   |
|-----------|--------|---------|--------|
| H2O       | 1.0000 | H2O     | 1.0000 |
| HM        | 0.9458 | HM      | 0.9474 |
| OT        | 0.9988 | OT      | 0.9977 |
| RK        | 0.9877 | RK      | 0.9887 |
| SW        | 0.9425 | SW      | 0.9392 |
| TG        | 0.8388 | TG      | 0.8379 |
| TS        | 0.9060 | TS      | 0.9033 |
| WT        | 0.9119 | WT      | 0.9051 |

**Figure S10.** ROC curve for cover types. H2O-water, HM-Hummock, OT-Other, RK-Rock, SW-Semi-wet, TG-Tall graminoid, TS-Tall shrub, WT-wet.



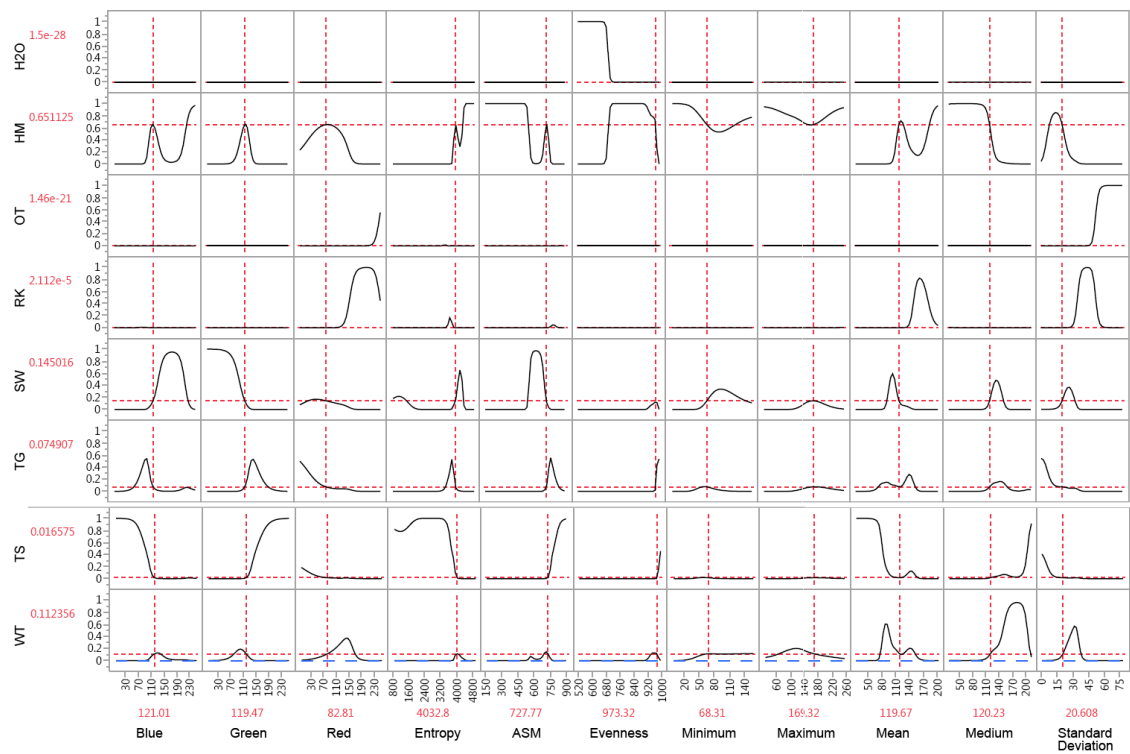

Figure 11. Prediction profiler indicating the response of different variables in the model for cover types. H2O-water, HM-Hummock, OT-Other, RK-Rock, SW-Semi-wet, TG-Tall graminoid, TS-Tall shrub, WT-wet.

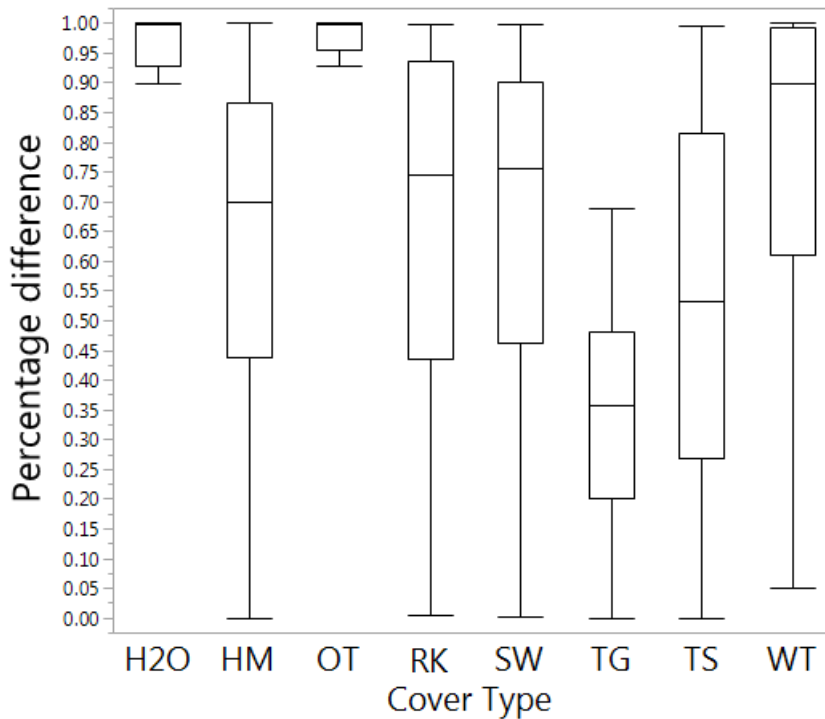

Figure S12. Difference in the probability for the highest and second highest classes from the ANN. H2O-water, HM-Hummock, OT-Other, RK-Rock, SW-Semi-wet, TG-Tall graminoid, TS-Tall shrub, WT-wet.

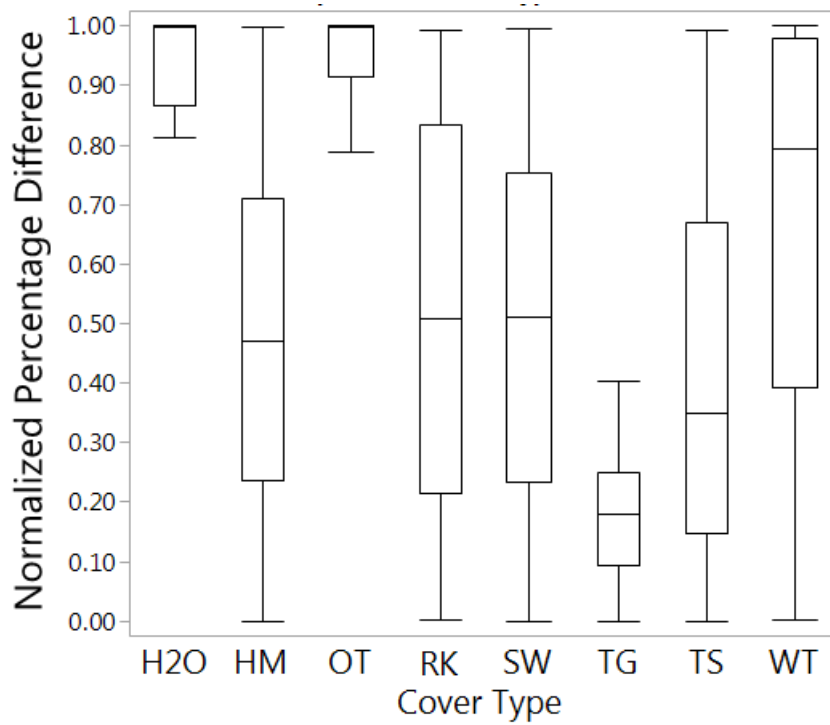

**Figure S13.** Normalized difference in the probability for the highest and second highest classes from the ANN. H2O-water, HM-Hummock, OT-Other, RK-Rock, SW-Semi-wet, TG-Tall graminoid, TS-Tall shrub, WT-wet.

**Table S1.** Annual average of cloud cover in Landsat imagery over Stordalen

| Year | Number of Images | Percent Cloud Cover |
|------|------------------|---------------------|
| 1984 | 34               | 33.02941176         |
| 1985 | 44               | 62.84090909         |
| 1986 | 42               | 64.33333333         |
| 1987 | 42               | 61.57142857         |
| 1988 | 46               | 63.2173913          |
| 1989 | 46               | 64.47826087         |
| 1990 | 41               | 60.51219512         |
| 1991 | 36               | 59.5                |
| 1992 | 44               | 46.77272727         |
| 1993 | 47               | 62.31914894         |
| 1994 | 31               | 60.16129032         |
| 1995 | 44               | 59.95454545         |
| 1996 | 34               | 57.38235294         |
| 1997 | 37               | 53.13513514         |
| 1998 | 34               | 66.38235294         |
| 1999 | 30               | 65.96666667         |
| 2000 | 67               | 53.41791045         |
| 2001 | 37               | 54.40540541         |
| 2002 | 40               | 50.275              |
| 2003 | 21               | 39.23809524         |

|      |     |             |
|------|-----|-------------|
| 2004 | 51  | 55.56862745 |
| 2005 | 47  | 59.74468085 |
| 2006 | 59  | 47.94915254 |
| 2007 | 47  | 62.0212766  |
| 2008 | 14  | 47.64285714 |
| 2009 | 42  | 60.85714286 |
| 2010 | 29  | 59.44827586 |
| 2011 | 43  | 61.02325581 |
| 2012 | 18  | 57.94444444 |
| 2013 | 57  | 66.35719298 |
| 2014 | 82  | 54.0454878  |
| 2015 | 91  | 62.91681319 |
| 2016 | 106 | 59.19688679 |
| 2017 | 108 | 63.05574074 |
| 2018 | 33  | 41.99515152 |

---
